# Supplementary material for: Molecular Cloning and Characterization of MbMYB108, a Malus baccata MYB Transcription Factor Gene, with Functions in Tolerance to Cold and Drought Stress in Transgenic Arabidopsis thaliana
Source: MDPI journal article supplement (doi:10.3390/ijms23094846), 2022-04-27
Supplement: s1 [file s1]

**Table S1.** List of primers used in this study.

| Primer Name         | Primer Sequence (5'→3')                     | Purpose                            |
|---------------------|---------------------------------------------|------------------------------------|
| <i>MbMYB108</i> -F  | ATGAATTACATTGCTAACCACGGCG                   | full-length cDNA of <i>MbMYB4</i>  |
| <i>MbMYB108</i> -R  | TCAAATGCTGCTGAGATGCTGTTGT                   | full-length cDNA of <i>MbMYB4</i>  |
| <i>site</i> -F      | GCTCTAGAATGGATGCTTTCTCT                     | PCR for restriction site insertion |
| <i>site</i> -R      | CGGGATCCAATGGAAAACTCC                       | PCR for restriction site insertion |
| <i>MbMYB108</i> -qF | GCTAACCACGGCGAAGGCC                         | qPCR                               |
| <i>MbMYB108</i> -qR | TTCCAGAATCAAAAGCTGTTCTTCA                   | qPCR                               |
| <i>Actin</i> -F     | ACACGGGGAGGTAGTGACAA                        | qPCR                               |
| <i>Actin</i> -R     | CCTCCAATGGATCCTCGTTA                        | qPCR                               |
| <i>HR</i> -F        | GGACAGGGTACCCGGGGATCCATGAATTACATTGCTAACCACG | qPCR                               |
| <i>HR</i> -R        | GCG                                         | PCR for homologous recombination   |
| <i>AtCBF1</i> -F    | CTGGCATGCCTGCAGGTCGACAAATGCTGCTGAGATGCTGTT  | PCR for homologous recombination   |
| <i>AtCBF1</i> -R    | GTAAG                                       | qPCR                               |
| <i>AtCBF3</i> -F    | TCGGGACTTTCCAAACCG                          | qPCR                               |
| <i>AtCBF3</i> -R    | CCATCTCCTTCGCCGTCAT                         | qPCR                               |
| <i>AtCOR15a</i> -F  | TCCGGTAAGTGGGTTTGAG                         | qPCR                               |
| <i>AtCOR15a</i> -R  | AACTCGGCATCTCAAACATCG                       | qPCR                               |
| <i>AtRD29a</i> -F   | CAACAGAGGAATCACCAGCGA                       | qPCR                               |
| <i>AtRD29a</i> -R   | CTCTGCTGCTTGTCTGTTGTT                       | qPCR                               |
| <i>AtNCED3</i> -F   | CAACGAGGGGAAGATAAAAGTGT                     | qPCR                               |
| <i>AtNCED3</i> -R   | AGCCAGATGATTTTGAGCCT                        | qPCR                               |
| <i>AtSnRK2.4</i> -F | ATGGCTTCTTCACGGCACGG                        | qPCR                               |
| <i>AtSnRK2.4</i> -R | TTCTTTTGGCCTCGGACG                          | qPCR                               |
| <i>AtCAT1</i> -F    | GAGGAAATGGGGATGCAGAT                        | qPCR                               |
| <i>AtCAT1</i> -R    | TTCTCACTTCTCCACTTGCG                        | qPCR                               |
| <i>AtP5CS</i> -F    | CGCCATGCCGAAAAATACCC                        | qPCR                               |
| <i>AtP5CS</i> -R    | CTTGCTGTCTGAATCCCAGGAC                      | qPCR                               |
| <i>AtActin</i> -F   | GATACGGATATGGCAAAGCG                        | qPCR                               |
| <i>AtActin</i> -R   | CCAAGTCCAAATCGGAAACC                        | qPCR                               |
|                     | CCCCTATGTATGTGCG                            | qPCR                               |
|                     | AAGGTCAAGACGGAGGAT                          |                                    |

ATGAATTACATTGCTAACCACGGCGAAGGCCGCTGGAACCTCCTCGCTGCGCAGGTCTGAAAAGAACTGGAAGAGCTGCAGATTG  
 M N Y I A N H G E G R W N S L A R C A G L K R T G A K S C R L  
 CGGTGGCTCAACTATCTCGCCCTGATGTCGTCGTTGAACATCAGTCTTGAAGAACAGCTTTGATTCTGGAAGCTCATTCTCGCTGG  
 R W L N Y L R P D V R R G N I S L E E Q L L I L E L H S R W  
 GGTAAACAGATGGTCGAAAATTGCACAGCACTTGCCAGGAAGGACTGACAATGAGATAAAAACTATTGGAGGACCCGTGTCCAAAACAT  
 G N R W S K I A Q H L P G R T D N E I K N Y W R T R V Q K H  
 GCCAAGCAACTCAAATGTGATGTCAACAGCAAGCAGTTCAAGGACACCATGAGATACCTCTGGATGCCTAGATTGGTCGAAAGAATCAA  
 A K Q L K C D V N S K Q F K D T M R Y L W M P R L V E R I Q  
 GCCGCCGCGGCCACCTCCACTGCCACTAACGCCACCGCGCTAATTCCTCTATCGCTGCCCCAGCTACCACTCACCCTCAACAACAAC  
 A A A A T S T A T N A T A A N S S I A A P A T T H H F N N N  
 AACATTAACAACCTCCAATCATCAGCACAAATGTTATTACAGCCAAGTCAACATCACTTCGGGGTTTCATCACACTCCCAACTCACACCG  
 N I N N F Q S S A Q M L L Q P S H H F G V S S H S Q L T P  
 AGTTACAGTACCCCGGAGAATTCTAGTACGGCGGCTCATCGGACTCGTTTGGGACTCAGGTATCACCTGTTTCCGACCTCACTGATTAC  
 S Y S T P E N S S T A A S S D S F G T Q V S P V S D L T D Y  
 TACACCCCTACTACTGCTGCTGCGGCTATCTCGGTTAACAATAACCTACCCGGATAATAGTTACTTCGTCAGGCCAATCATCAAGTT  
 Y T P T T A A A A I S V N N N P T P D N S Y F V Q A N H Q V  
 GGTACTTACGACAACACTACTCGGGTACTTCGGTAATCAAGGGTTCGGATTAGAACATTTCCAAAACATGGACGAGCAAAACAACATGAT  
 G T Y D N Y S G Y F G N Q G F G L E H F Q N M D E Q N N N D  
 CAGTGGGGCACTGTGTACAGTGGGGACATATCGGACAATTGGTGGAATGTTGAGGACATGTGGTTCTTACAACAGCATCTCAGCAGCATTGA  
 Q W G T V Y S G D I S D N W W N V E D M W F L Q Q H L S S I \*

**Figure S1.** Nucleotide and deduced amino acid sequences of *MbMYB108* gene. The underlined part was that the R2 and R3 conserved domains of *MbMYB108* gene which were also characteristic domains of R2R3-MYB TFs.
